# Supplementary material
Source: Springer Nature journal article supplement (https://www.springermedizin.de/resource/supplementary/12974_2010_352_MOESM1_ESM.pdf/9601478)

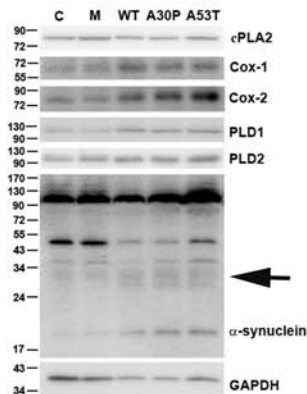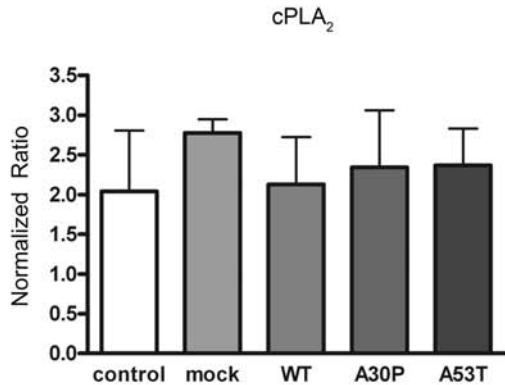

Cox-1

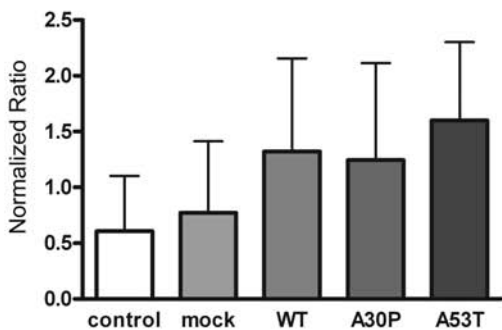

Cox-2

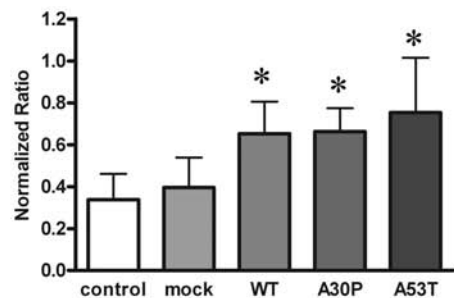

PLD1

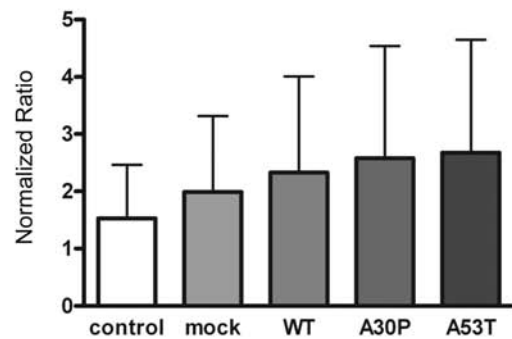

PLD2

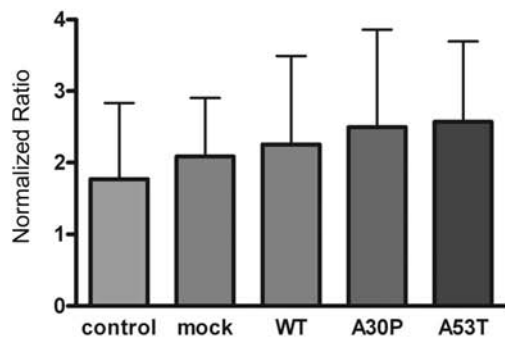

Supplement: MOESM1 [file 9601478]
